# Supplementary material
Source: publisher figshare collection journal article supplement (https://tandf.figshare.com/ndownloader/files/22643636)
Supplement: Supplementary file 1 [file 22643636]

## Technical Appendix

**Table A1. Summary, logistic regression results.**

| Parameter                                         | Estimate | Standard Error | Pr(> z ) |
|---------------------------------------------------|----------|----------------|----------|
| Intercept                                         | -7.28    | 0.22           | 0.00 *** |
| Percentage industrial building occupancy          | 1.62     | 0.12           | 0.00 *** |
| Empire Zone flag                                  | 2.14     | 0.09           | 0.00 *** |
| Remediation flag                                  | -1.52    | 1.28           | 0.24     |
| As-of-right residential development flag          | 5.29     | 1.61           | 0.00 **  |
| Distance to closest subway stop                   | -9.01    | 10.07          | 0.37     |
| Distance to closest truck route                   | 1.96     | 0.71           | 0.01 **  |
| Percentage manufacturing zoning                   | 4.34     | 0.21           | 0.00 *** |
| Lagged change in total residential property value | -7.69    | 1.44           | 0.00 *** |
| Lagged employment density                         | 1.22     | 0.24           | 0.00 *** |
| Lagged land use density                           | 3.51     | 0.32           | 0.00 *** |

Notes: \* =  $p < .05$ ; \*\* =  $p < .01$ ; \*\*\* =  $p < .001$

Source: New York City Department of City Planning, Primary Land Use Tax Lot Output; New York City Department of Information Technology & Telecommunications; New York City Department of Transportation; New York State Department of Environmental Conservation, Environmental Site Remediation Database; U.S. Census Bureau, Longitudinal Employer-Household Dynamics Origin-Destination Employment Statistics.

**Table A2. Summary, logistic regression results (excluding Staten Island and Queens).**

| Parameter                                         | Estimate | Standard Error | Pr(> z ) |
|---------------------------------------------------|----------|----------------|----------|
| Intercept                                         | -7.31    | 0.24           | 0.00 *** |
| Percentage industrial building occupancy          | 1.34     | 0.13           | 0.00 *** |
| Empire Zone flag                                  | 2.34     | 0.10           | 0.00 *** |
| Remediation flag                                  | -1.41    | 1.36           | 0.30     |
| As-of-right residential development flag          | 5.70     | 1.73           | 0.00 **  |
| Distance to closest subway stop                   | 78.86    | 12.61          | 0.00 *** |
| Distance to closest truck route                   | 0.12     | 0.82           | 0.88     |
| Percentage manufacturing zoning                   | 4.67     | 0.23           | 0.00 *** |
| Lagged change in total residential property value | -20.83   | 4.14           | 0.00 *** |
| Lagged employment density                         | 1.38     | 0.23           | 0.00 *** |
| Lagged land use density                           | 2.86     | 0.34           | 0.00 *** |

Notes: \* =  $p < .05$ ; \*\* =  $p < .01$ ; \*\*\* =  $p < .001$

Source: New York City Department of City Planning, Primary Land Use Tax Lot Output; New York City Department of Information Technology & Telecommunications; New York City Department of Transportation; New York State Department of Environmental Conservation, Environmental Site Remediation Database; U.S. Census Bureau, Longitudinal Employer-Household Dynamics Origin-Destination Employment Statistics.

**Table A3. Difference in means, pre-matching and post-matching characteristics of IBZ census blocks versus candidate census blocks (excluding Staten Island and Queens).**

| Measure                                           | IBZ Blocks<br>(n = 1,250) | Non-IBZ Blocks                      |                                  | Difference of Means, t-tests |                              |
|---------------------------------------------------|---------------------------|-------------------------------------|----------------------------------|------------------------------|------------------------------|
|                                                   |                           | Candidate<br>Blocks<br>(n = 25,849) | Matched<br>Blocks<br>(n = 1,250) | IBZ vs. Candidate<br>Blocks  | IBZ vs.<br>Matched<br>Blocks |
| Propensity score                                  | 0.60                      | 0.02                                | 0.34                             | -                            | 0.00                         |
| Percentage industrial building occupancy          | 0.68                      | 0.05                                | 0.53                             | 0.00                         | 0.00                         |
| Empire Zone flag                                  | 0.70                      | 0.05                                | 0.31                             | 0.00                         | 0.00                         |
| Remediation flag                                  | 0.16                      | 0.02                                | 0.15                             | 0.00                         | 0.58                         |
| As-of-right residential development flag          | 0.13                      | 0.82                                | 0.19                             | 0.00                         | 0.00                         |
| Distance to closest subway stop                   | 0.00                      | 0.00                                | 0.00                             | 0.00                         | 0.00                         |
| Distance to closest truck route                   | 0.05                      | 0.09                                | 0.04                             | 0.00                         | 0.14                         |
| Percentage manufacturing zoning                   | 0.92                      | 0.05                                | 0.91                             | 0.00                         | 0.31                         |
| Lagged change in total residential property value | 0.00                      | 0.00                                | 0.00                             | 0.00                         | 0.27                         |
| Lagged employment density                         | 0.03                      | 0.00                                | 0.03                             | 0.00                         | 0.85                         |
| Lagged land use density                           | 0.20                      | 0.02                                | 0.15                             | 0.00                         | 0.00                         |

Source: New York City Department of City Planning, Primary Land Use Tax Lot Output; New York City Department of Information Technology & Telecommunications; New York City Department of Transportation; New York State Department of Environmental Conservation, Environmental Site Remediation Database; U.S. Census Bureau, Longitudinal Employer-Household Dynamics Origin-Destination Employment Statistics.

**Table A4. Outcome: Change in business registrations (excluding Staten Island and Manhattan).**

|                              | IBZ Census Blocks            |                             |                   | Comparison Census Blocks     |                              |                   | p-value     |
|------------------------------|------------------------------|-----------------------------|-------------------|------------------------------|------------------------------|-------------------|-------------|
|                              | Registrations, 2000-<br>2005 | Registrations,<br>2007-2012 | Percent<br>Change | Registrations, 2000-<br>2005 | Registrations, 2007-<br>2012 | Percent<br>Change |             |
| <b>Industrial Sector</b>     |                              |                             |                   |                              |                              |                   |             |
| Utilities                    | 1                            | 5                           | -                 | 0                            | 7                            | -                 | -           |
| Manufacturing                | 91                           | 175                         | 92%               | 54                           | 116                          | 115%              | 0.10        |
| Wholesale Trade              | 159                          | 303                         | 91%               | 111                          | 229                          | 106%              | 0.39        |
| Transportation & Warehousing | 28                           | 62                          | 121%              | 20                           | 50                           | 150%              | 0.55        |
| <b>Total</b>                 | <b>279</b>                   | <b>545</b>                  | <b>95%</b>        | <b>185</b>                   | <b>402</b>                   | <b>117%</b>       | <b>0.23</b> |

Source: New York State Department of Finance and Taxation, Form DTF-17.1.

**Table A5. Outcome: Employment change (excluding Staten Island and Manhattan).**

|                                         | IBZ Census Blocks  |                    |                   | Comparison Census Blocks |                    |                   | p-value     |
|-----------------------------------------|--------------------|--------------------|-------------------|--------------------------|--------------------|-------------------|-------------|
|                                         | Employees,<br>2005 | Employees,<br>2012 | Percent<br>Change | Employees,<br>2005       | Employees,<br>2012 | Percent<br>Change |             |
| <b>Utilities</b>                        | 394                | 369                | -6%               | 6                        | 21                 | -                 | 0.86        |
| <b>Manufacturing</b>                    | 31,880             | 21,932             | -31%              | 18,866                   | 11,792             | -37%              | 0.24        |
| <b>Wholesale Trade</b>                  | 28,172             | 28,318             | 1%                | 12,418                   | 9,827              | -21%              | 0.27        |
| <b>Transportation &amp; Warehousing</b> | 40,897             | 39,330             | -4%               | 7,591                    | 15,196             | 100%              | 0.56        |
| <b>Total</b>                            | <b>101,343</b>     | <b>89,949</b>      | <b>-11%</b>       | <b>38,881</b>            | <b>36,836</b>      | <b>-5%</b>        | <b>0.57</b> |

Source: U.S. Census Bureau, Longitudinal Employer-Household Dynamics Origin-Destination Employment Statistics.

**Table A6. Outcome: Permits (excluding Staten Island and Manhattan).**

|                          | Total Permits, 2005 | Total Permits, 2012 | Percent Change | p-value |
|--------------------------|---------------------|---------------------|----------------|---------|
| Comparison Census Blocks | 1,640               | 1,698               | 4%             | 0.40    |
| IBZ Census Blocks        | 1,432               | 1,666               | 16%            |         |
| <b>Citywide</b>          | <b>8,313</b>        | <b>7,334</b>        | <b>-12%</b>    |         |

Source: New York City Department of Buildings, Permit Issuance.

**Table A7. Outcome: Change in industrial land (excluding Staten Island and Manhattan).**

|                          | <b>Industrial<br/>Land<br/>(Acres), 2005</b> | <b>Industrial<br/>Land<br/>(Acres), 2012</b> | <b>Percent<br/>Change</b> | <b>p-value</b> |
|--------------------------|----------------------------------------------|----------------------------------------------|---------------------------|----------------|
| Comparison Census Blocks | 1,351                                        | 1,068                                        | -21%                      | 0.02           |
| IBZ Census Blocks        | 2,495                                        | 2,378                                        | -5%                       |                |
| <b>Citywide</b>          | <b>5,844</b>                                 | <b>5,247</b>                                 | <b>-10%</b>               |                |

Source: New York City Department of City Planning, Primary Land Use Tax Lot Output.
